# Supplementary material for: Self-Reported Periodontitis and Incident Type 2 Diabetes among Male Workers from a 5-Year Follow-Up to MY Health Up Study
Source: PubMed Central journal article supplement (PMC4846029; doi:10.1371/journal.pone.0153464), 2016-04-26
Supplement: pone.0153464.s001.pdf [file pone.0153464.s001.pdf]

S1 Table. The influence of the oral health indicators on incident type 2 diabetes in modified Poisson regression analysis for women.

| Independent Variables                                   | Adjusted Relative Risk for incident diabetes (95% confidence interval) for women aged 36-55 years. |                  |
|---------------------------------------------------------|----------------------------------------------------------------------------------------------------|------------------|
|                                                         | Model 1                                                                                            | Model 2          |
| Gingival hemorrhage (reference: no gingival hemorrhage) | 0.99 (0.79–1.24)                                                                                   | -                |
| Tooth loosening (reference: no tooth loosening)         | -                                                                                                  | 1.08 (0.81–1.43) |

Model 1 used gingival hemorrhage as an oral status indicator. Model 2 used tooth loosening as an oral status indicator.

The other covariates consisted of age, current smoking habits, BMI, family history of diabetes, hypertension, alcohol heavy consumption, and exercise habits.
